# Supplementary material for: Quantitative characterization of orogens through isotopic mapping
Source: Research Square preprint supplement (doi:10.21203/rs.3.rs-1625815/v1), 2022-06-15
Supplement: Supplementary file 1 [file 6dadb2e5eb4ce357f2d3283b.xlsx]

## Sheet: 8 orogens 20200502 submitted
	Table S2. Areas and area percents of isotopic domains and provinces of the eight orogens
1	Altaids (CAOB)	εNd(t) values	Area（%）	Province（%）		Total primitive/juvenile area（%）
		6-10	2.64955	I	2.64955	58.6166
		4-6	15.4626	II	35.8361
		2-4	20.3735
		0-2	20.131	III	20.131
		-2 - 0	17.2729	IV	31.6427	41.3834
		-4 - -2	14.3698
		-6 - -4	4.3175	V	8.51627
		-8 - -6	2.6335
		-10 - -8	1.56527
		-12 - -10	0.760172	VI	1.2244
		-14 - -12	0.366893
		-16 - -14	0.0688148
		-18 - -16	0.0146187
		< -18	0.0139056
			100		100	100
2	North American Cordillera	εNd values	Area（%）	Province（%）		Total primitive/juvenile（%）
		6-10	6.69007	I	6.69007	48.2143
		4-6	13.7164	II	22.4246
		2-4	8.7082
		0-2	19.0996	III	19.0996
		-2 - 0	16.8706	IV	23.4375	51.7857
		-4 - -2	6.56689
		-6 - -4	5.34765	V	17.9244
		-8 - -6	6.56554
		-10 - -8	6.01122
		-12 - -10	4.44581	VI	10.4238
		-14 - -12	2.54458
		-16 - -14	1.53349
		-18 - -16	0.683349
		< -18	1.21654
			100		100	100
3	Newfoundlan Appalachians	εNd values	Area（%）	Province（%）		Total primitive/juvenile（%）
		6-10	4.41182	I	4.41182	39.9875
		4-6	13.0029	II	22.9928
		2-4	9.98993
		0-2	12.5829	III	12.5829
		-2 - 0	13.0654	IV	28.9875	60.0125
		-4 - -2	15.9221
		-6 - -4	15.6965	V	31.025
		-8 - -6	10.9306
		-10 - -8	4.39793
		-12 - -10	0	VI	0
		-14 - -12	0
		-16 - -14	0
		-18 - -16	0
		< -18	0
			100		100	100
4	Lachlan	εNd values	Area（%）	Province（%）		Total primitive/juvenile（%）
		6-10	0.187776	I	0.187776	31.1802
		4-6	15.8858	II	20.9699
		2-4	5.08403
		0-2	10.0225	III	10.0225
		-2 - 0	21.5097	IV	49.7888	68.8198
		-4 - -2	28.279
		-6 - -4	15.9562	V	18.9935
		-8 - -6	2.92461
		-10 - -8	0.112665
		-12 - -10	0.00938879	VI	0.0375552
		-14 - -12	0.0187776
		-16 - -14	0.00469439
		-18 - -16	0.00469439
		< -18	0
			100		100	100
5	Tibet	εNd values	Area（%）	Province（%）		Total primitive/juvenile（%）
		6-10	0	I	0	3.71526
		4-6	0.0166417	II	0.4
		2-4	0.341155
		0-2	3.35746	III	3.4
		-2 - 0	4.89682	IV	19.1338	96.2847
		-4 - -2	14.237
		-6 - -4	31.4112	V	67.9522
		-8 - -6	24.5049
		-10 - -8	12.0361
		-12 - -10	8.3791	VI	9.1987
		-14 - -12	0.773839
		-16 - -14	0.0457647
		-18 - -16	0
		< -18	0
			100		100.085	100
6	Caledonides	εNd values	Area（%）	Province（%）		Total primitive/juvenile（%）
		6-10	0	I	0	1.15852
		4-6	0.029994	II	0.119976
		2-4	0.089982
		0-2	1.03854	III	1.03854
		-2 - 0	7.94466	IV	38.1636	98.8415
		-4 - -2	30.219
		-6 - -4	29.1767	V	60.1042
		-8 - -6	17.7714
		-10 - -8	13.1561
		-12 - -10	0.569886	VI	0.573635
		-14 - -12	0.00374925
		-16 - -14	0
		-18 - -16	0
		< -18	0
			100		100	100
7	Variscides	εNd values	Area（%）	Province（%）		Total primitive/juvenile（%）
		6-10	0	I	0	0.696806
		4-6	0.0146037	II	0.0917948
		2-4	0.0771911
		0-2	0.605011	III	0.605011
		-2 - 0	5.47848	IV	36.7304	99.3032
		-4 - -2	31.252
		-6 - -4	52.3209	V	62.5686
		-8 - -6	10.2289
		-10 - -8	0.0187762
		-12 - -10	0.00417249	VI	0.00417249
		-14 - -12	0
		-16 - -14	0
		<-18	0
			0		100	100
8	Qinling-Dabie	εNd values	Area（%）	Province（%）		Total primitive/juvenile（%）
		6-10	0.00876962	I	0.00876962	0.289398
		4-6	0.0175392	II	0.0876962
		2-4	0.070157
		0-2	0.192932	III	0.192932
		-2 - 0	2.10471	IV	23.3272	99.7106
		-4 - -2	21.2225
		-6 - -4	37.8497	V	54.8715
		-8 - -6	12.6633
		-10 - -8	4.3585
		-12 - -10	3.63939	VI	21.5119
		-14 - -12	4.82329
		-16 - -14	8.56792
		<-18	4.48128
			100		100	100
