# Supplementary material for: Quantitative characterization of orogens through isotopic mapping
Source: Research Square preprint supplement (doi:10.21203/rs.3.rs-1625815/v1), 2022-06-15
Supplement: Supplementary file 2 [file 80ce40377a769b08f13ae39d.docx]

**Table S3. Isotopic provinces (or domains) determined by Nd isotope mapping and crustal features**

| **Isotopic/crust domains and origin** | | | | | **Altaids**  **(CAOB)** | **N. Am. Cordillera** | **Appalachians (NFL)** | **Lachlan** | **Tibet** | **Caledonides** | **Variscides** | **Qinling-Dabie** |
| --- | --- | --- | --- | --- | --- | --- | --- | --- | --- | --- | --- | --- |
| **Province** | | | **Isotopes** | **Crust** |
| Juvenile crust | I | Strongly juvenile | Extremely primitive. εNd(t)> +6. | Intra-oceanic arcs. | 184050 km2, **3%** area; e.g., WJ. | 372025 km2, 7% area. NW. SE. coast batholith | 16 km2, **0.0%** area; | 1000 km2, **0.19%** area; e.g., NW. Lachlan | Little | 0 km2, 0 area; | 0 km2, 0 area; | 25 km2,  0 area; |
| II | Moderately juvenile | Moderately primitive. εNd(t) = +2 to +6. | . Accretionary terranes | 2504225 km2, **36%** area; e.g., MG., GXR. | 1247000 km2, 22% area Coast batholith | 19332 km2, **17%** area; Mainly in Avalon Zone; Few in Notre Dame Subzone; | 111,675 km2, **21%** area; N. Lachlan | 8,600 km2, **0.4 %** area; e.g., S. LS | 800 km2, ~**0%** area; Few in western Ireland and Cluanie area, Scotland | 3047 km2, **0.3%** area; Few1n Coast Island | 250 km2, **0.1%** area; Shangdan suture |
| III | Slightly juvenile (mixed) | Slightly primitive. εNd(t) = +2 to 0. | /Reworked mixed accretionary terranes (mélange) | 1419075 km2, **20%** area; e.g., NTS, S. MG. | 1062100 km2, 19% area | 21212 km2, **18%** area; Mainly in Avalon Zone | 53375 km2, **10%** area; N. Lachlan | 80,700 km2, **3.4%** area; e.g., S. LS | 6925 km2, **1%** area; e.g., Strontian area, Scotland | 10365 km2, **0.9%** area; e.g., Corsica–Sardinia batholith | 550 km2, **0.2%** area; Shangdan suture；0% in Dabie |
| Reworked ancient crust | IV | Slightly ancient (mixed) | Slightly evolved. εNd(t) = -4 to 0. | . Pre-orogenic terranes/reworked microcontinents. | 2216050km2, **32%** area; Remained reworked terranes. E.g., Altai | 1303325 km2, 23% area; interior lntermontane | 59760 km2, **52%** area; Exploits Subzone and Gander Zone | 265,150 km2, **50%** area; W. Lachlan | 459,900 km2, **19%** area; e.g., QT, LS | 254475 km2, **38%** area; e.g., W. Ireland and N. Highlands Terran | 390037 km2, **33%** area; e.g., SW Iberian massif | 66500 km2, **23%** area; e.g., NQB, SQB |
| V | Moderately ancient | Moderately evolved εNd(t) = -10 to -4. | Pre-orogenic terranes/reworked microcontinents | 597975 km2,**9%** area; Erguna, Yili-south Tianshan. | 996750 km2, 18% area；Rocky Mountains Anatectic Belt | 14984 km2, **13%** area; εNd(t) = < -8. Exploits Subzone and Gander Zone | 101,150km2, 19**%** area; C-E. Lachlan | 1,633,300 km2, **68%** area; e.g., QT, LS | 400775 km2, **60%** area; e.g., Scotland and northern England; Svalbard | 764264 km2, **65%** area; e.g., Bohemian Massif; French Massif and Italy | 165425 km2, **55%** area; e.g., NQB, SQB |
| VI | Strongly ancient e | Highly evolved εNd(t) = < -10. | Cratons/microcontinent Reworked very ancient terranes | 89000 km2, **1%** area; e.g., Tuva | 579650 km2, 10% area; Rocky Mountains. Anatectic Belt | 40 km2, **0.0%** area | 200 km2, **0.04%** area; C. Lachlan | 221,100 km2, **9%** area; e.g., QT, LS | 3825 km2, **1%** area; e.g., Greenland, SW Norway | 100 km2, **~0%** area; e.g., Northern Portugal | 61325 km2, **22%** area; e.g., NCC, SCC |

t = syn-orogenic time or period; isotopic features are for felsic and intermediate igneous rocks that were mainly derived from the crust; juvenile crust is generally defined as εNd(t) > 0 (Appendix B). NFL = Newfoundland; WJ = West Junggar; S. = Southern; N. = Northern; C. = Central; W. = Western; ML = Mongolian; BXR = Great Xing’an Range; LS = Lhasa Block; QT = Qiangtang Block; NCC = North China Craton; SCC = South China Craton; NTS = North Tianshan; STS = South Tianshan.
